# Supplementary material
Source: HighWire-hosted journal article supplement (https://cmaj.ca/highwire/filestream/68207/field_highwire_adjunct_files/0/170092-res-1-at.pdf)
Supplement: 170092-res-1-at.pdf [file 170092-res-1-at.pdf]

## **Appendix 1 (as supplied by the authors): Supplementary tables and figures**

**Table 1.** Billing codes eligible to be accompanied by the incentive code (e080)

**Table 2.** Primary care billing codes used to virtually roster patients to primary care providers

**Figure 1.** Study Flowchart

**Figure 2.** Proportion of patient discharges with a Charlson comorbid score=0, by month of hospital discharge

**Figure 3.** Mean number of outpatient visits per patient in year prior to hospital discharge, by month of hospital discharge.

**Figure 4.** Proportion of patient discharges assigned to primary care providers in each funding group, by month of hospital discharge.

**eFigure 5.** Proportion of patient discharges with physician follow-up after hospital discharge, by physician type and month of discharge.

**Figure 6.** Proportion of urgent hospital discharges with a physician follow-up within 14 days, by month.

**Figure 7.** Proportion of pediatric discharges (age<18 years) with a physician follow-up within 14 days, by month.

**Figure 8.** Proportion of adult discharges (age 18-64 years) with a physician follow-up within 14 days, by month.

**Figure 9.** Proportion of older adult discharges (age 65+) with a physician follow-up within 14 days, by month.

**Figure 10.** Proportion of patient discharges having primary care physician (PCP) follow-up within 14 days of hospital discharge, by month, according to PCP quartile of incentive code uptake.

**Figure 11.** Proportion of hospital discharges with any physician follow-up within 14 days, by month, according to primary care physician funding model.

**eTable 1.** Billing codes eligible to be accompanied by the incentive code (e080)

| <b>Code</b> | <b>Description</b>                                                                 | <b>Monetary Value (\$ Canadian)</b> |
|-------------|------------------------------------------------------------------------------------|-------------------------------------|
| A001        | Minor assessment                                                                   | 21.70                               |
| A003        | General assessment                                                                 | 77.20                               |
| A004        | General re-assessment                                                              | 38.35                               |
| A007        | Intermediate assessment or well-baby care                                          | 33.70                               |
| A008        | Mini-assessment (with disability insurance visit)                                  | 13.05                               |
| A261        | Level 1- Pediatric assessment                                                      | 21.50                               |
| A262        | Level 2 - Pediatric assessment                                                     | 42.15                               |
| A263        | Medical specific assessment                                                        | 77.70                               |
| A264        | Medical specific re-assessment                                                     | 59.45                               |
| A888        | Emergency department equivalent - partial assessment                               | 35.40                               |
| A900        | Complex house call assessment                                                      | 45.15                               |
| A901        | House call assessment                                                              | 45.15                               |
| A903        | Pre-dental/pre-operative general assessment                                        | 65.05                               |
| K004        | Family psychotherapy                                                               | 68.10 per 30 minutes                |
| K005        | Primary mental healthcare, individual                                              | 62.75                               |
| K006        | Hypnotherapy, individual care                                                      | 62.75 per 30 minutes                |
| K007        | Psychotherapy, individual care                                                     | 62.75 per 30 minutes                |
| K008        | Diagnostic interviewing and/or counselling with child and/or parent                | 62.75 per 30 minutes                |
| K013        | Counselling                                                                        | 62.75 per 30 minutes                |
| K014        | Counselling for transplant recipients, donors or families of recipients and donors | 62.75 per 30 minutes                |
| K022        | HIV primary care                                                                   | 62.75 per 30 minutes                |
| K023        | Palliative care support                                                            | 62.75 per 30 minutes                |
| K028        | STD management                                                                     | 62.75 per 30 minutes                |
| K029        | Insulin therapy support                                                            | 62.75 per 30 minutes                |
| K030        | Diabetic Management Assessment                                                     | 39.20                               |
| K032        | Specific neurocognitive assessment                                                 | 62.75                               |
| K033        | Counselling (after first three sessions in 12 month period)                        | 38.15 per 30 minutes                |
| K037        | Fibromyalgia/chronic fatigue syndrome care                                         | 62.75 per 30 minutes                |
| K623        | Completion of Form 1- Request for psychiatric assessment                           | 104.80                              |
| P003        | General assessment (major prenatal visit)                                          | 77.20                               |
| P004        | Minor prenatal assessment                                                          | 33.70                               |
| P008        | Postnatal care in office                                                           | 33.70                               |

**eTable 2.** Primary care billing codes used to virtually roster patients to primary care physicians.

| <b>Code</b> | <b>Description</b>                                            |
|-------------|---------------------------------------------------------------|
| A001        | Minor assessment                                              |
| A002        | 18 month well baby check                                      |
| A003        | General assessment                                            |
| A004        | General re-assessment                                         |
| A007        | Intermediate assessment, well baby check                      |
| A268        | Enhanced 18-month well-baby visit (billed by pediatrician)    |
| A903        | Preoperative assessment                                       |
| E075        | Geriatric general assessment premium                          |
| G212        | Allergy injection alone                                       |
| G271        | Anticoagulant supervision                                     |
| G365        | Papanicolaou test                                             |
| G372        | Injection, with visit                                         |
| G373        | Injection, sole reason                                        |
| G538        | Immunization, with visit                                      |
| G539        | Immunization, sole reason                                     |
| G590        | Influenza immunization, with visit                            |
| G591        | Influenza immunization, sole reason                           |
| K005        | Primary mental health care                                    |
| K013        | Counselling, individual care                                  |
| K017        | Annual health exam, child after second birthday               |
| P004        | Minor prenatal assessment                                     |
| K022        | HIV primary care                                              |
| K131        | Adult periodic health visit age 18-64                         |
| K132        | Adult periodic health visit over age 65                       |
| K039        | Smoking cessation follow-up                                   |
| A901        | House call assessment                                         |
| A900        | Complex house call assessment                                 |
| K267        | Annual health exam, child 2–11 years (billed by pediatrician) |
| K269        | Annual adolescent health exam (billed by pediatrician)        |

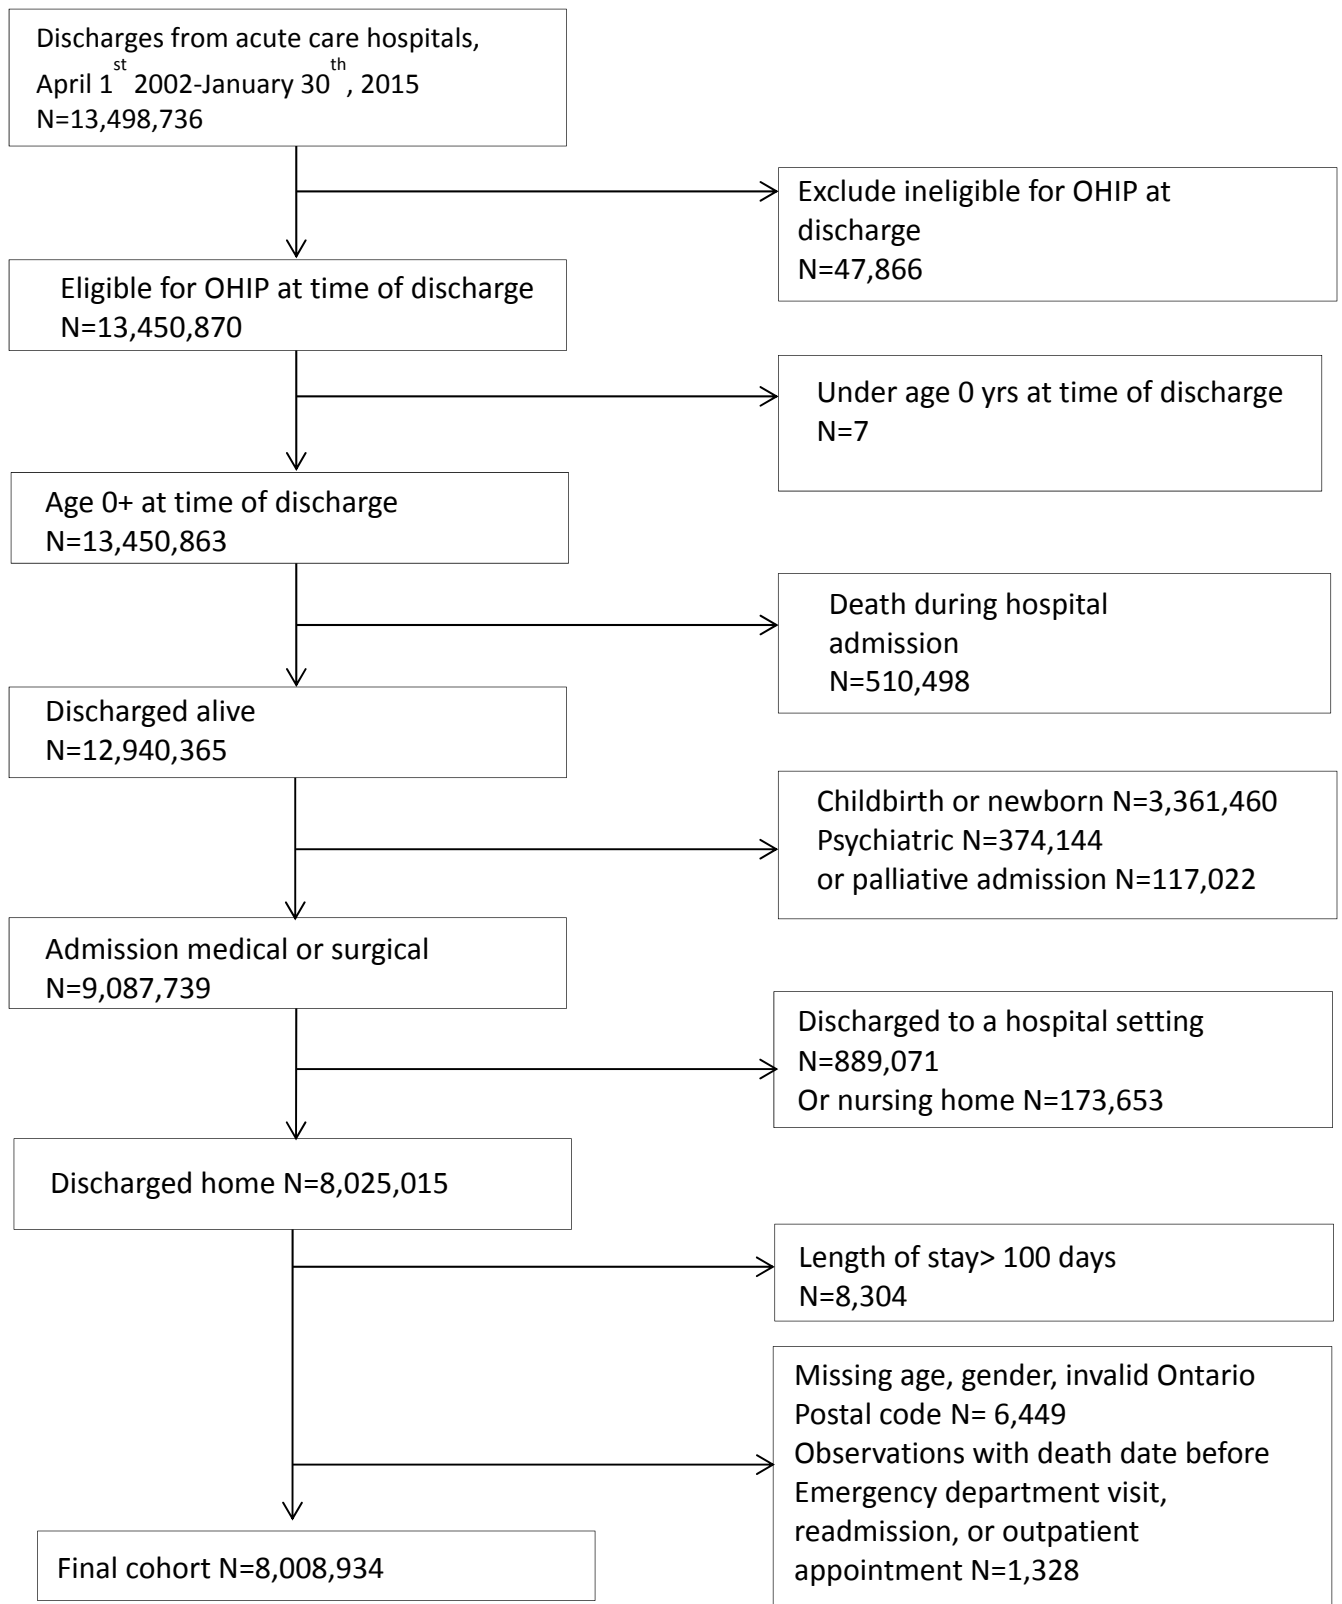

**eFigure 1.** Study Flowchart. OHIP= Ontario Health Insurance Plan

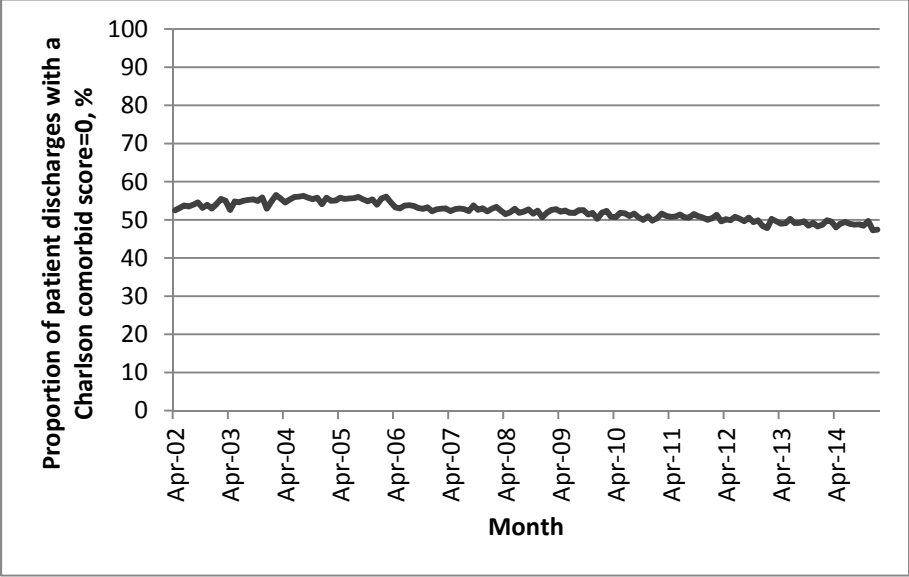

**eFigure 2.** Proportion of patient discharges with a Charlson comorbid score=0, by month of hospital discharge

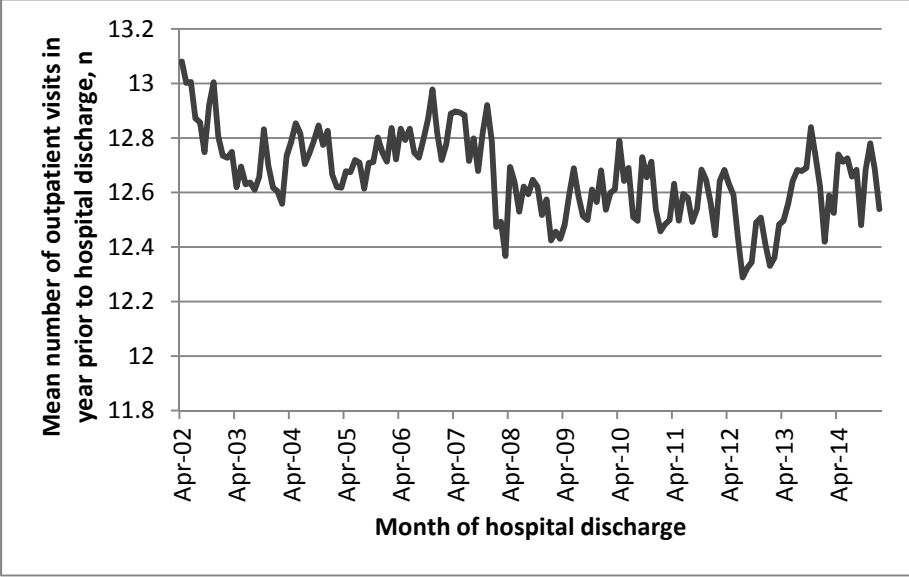

**eFigure 3.** Mean number of outpatient visits per patient in year prior to hospital discharge, by month of hospital discharge.

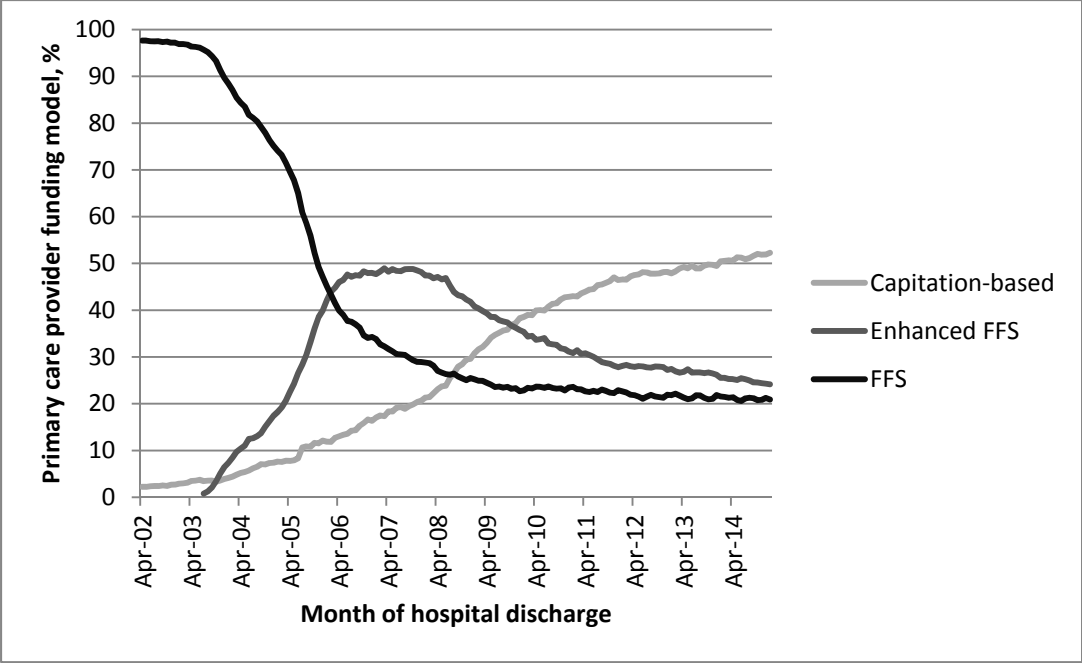

**eFigure 4.** Proportion of patient discharges assigned to primary care providers in each funding group, by month of hospital discharge. FFS=fee-for-service

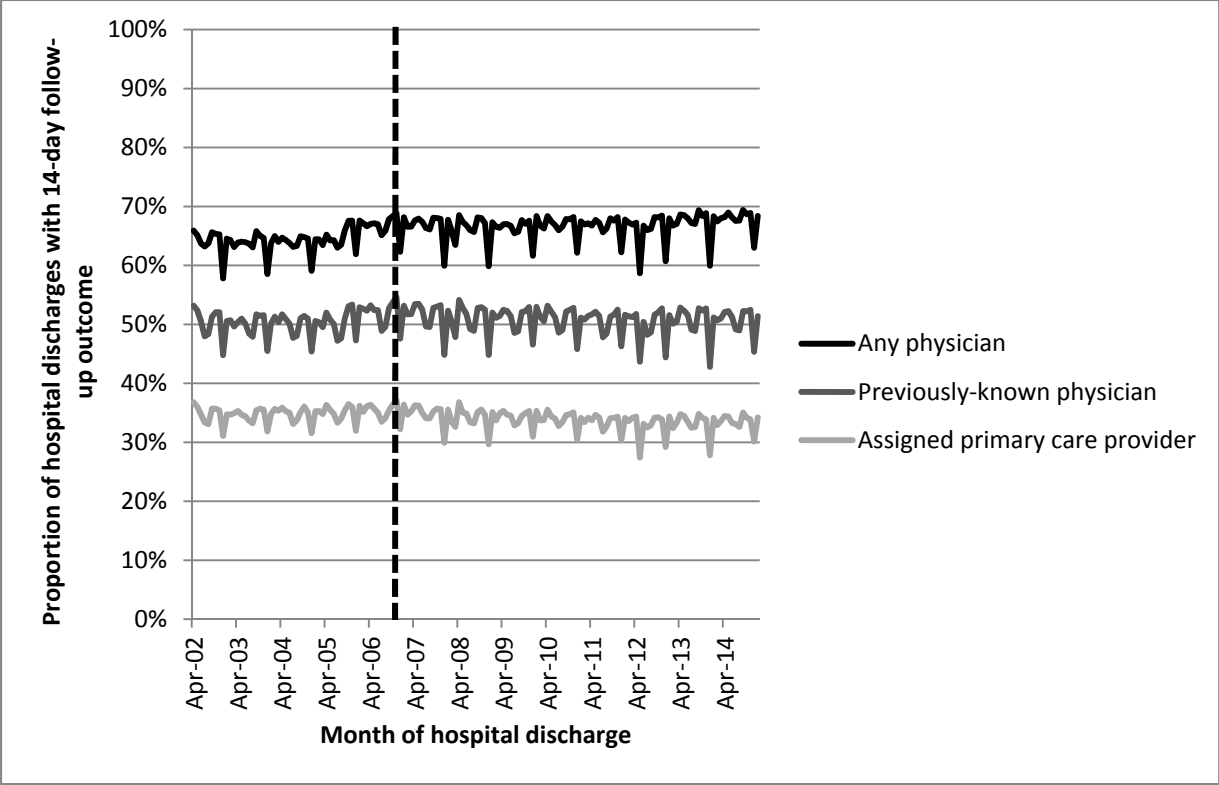

**eFigure 5.** Proportion of patient discharges with physician follow-up after hospital discharge, by physician type and month of discharge. Dashed line identifies timing of incentive code introduction.

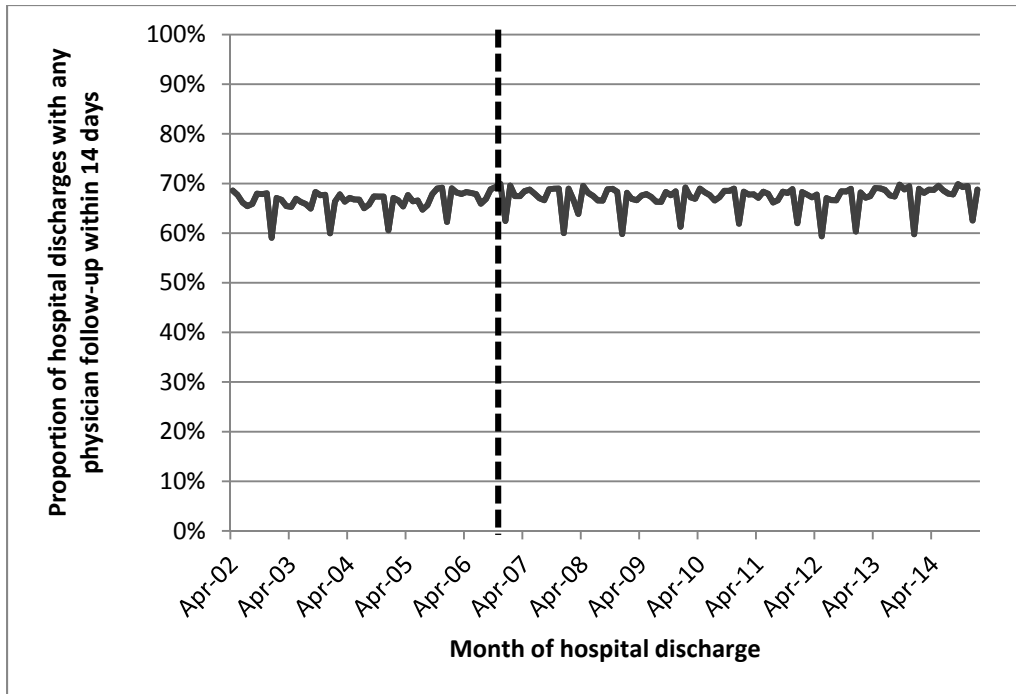

**eFigure 6.** Proportion of urgent hospital discharges with a physician follow-up within 14 days, by month. Dashed line identifies timing of incentive code introduction. N= 5,569,989

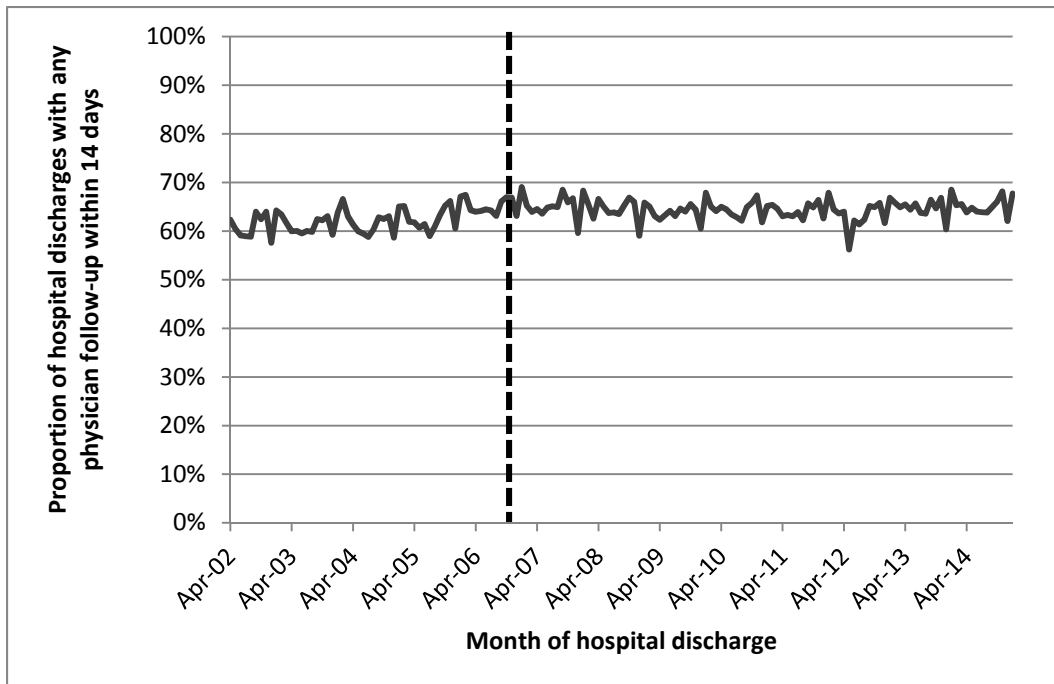

**eFigure 7.** Proportion of pediatric discharges (age < 18 years) with a physician follow-up within 14 days, by month. Dashed line identifies timing of incentive code introduction. N= 884,081



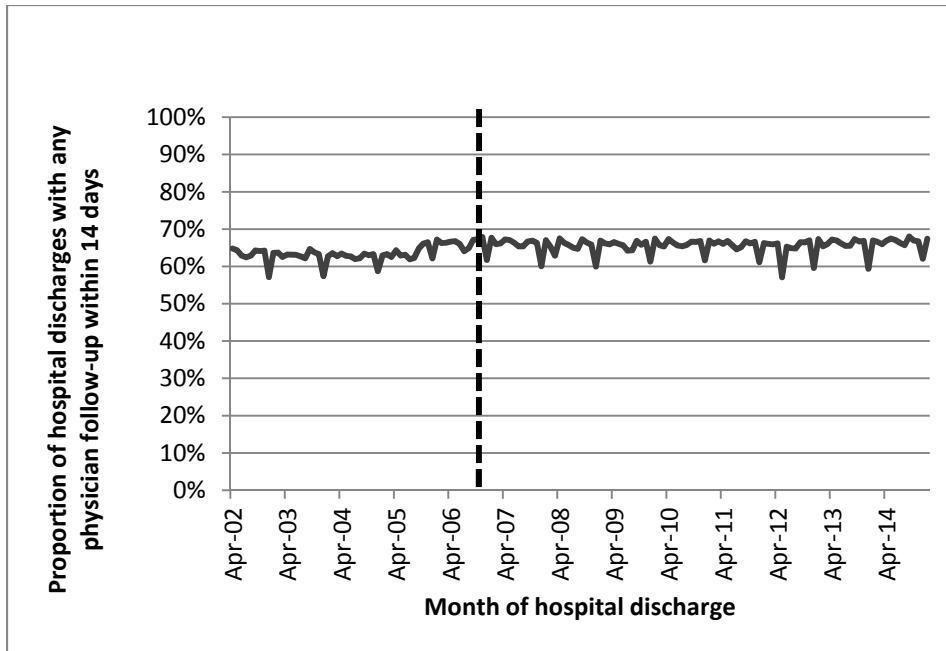

**eFigure 8.** Proportion of adult discharges (age 18-64 years) with a physician follow-up within 14 days, by month. Dashed line identifies timing of incentive code introduction. N=3,886,964

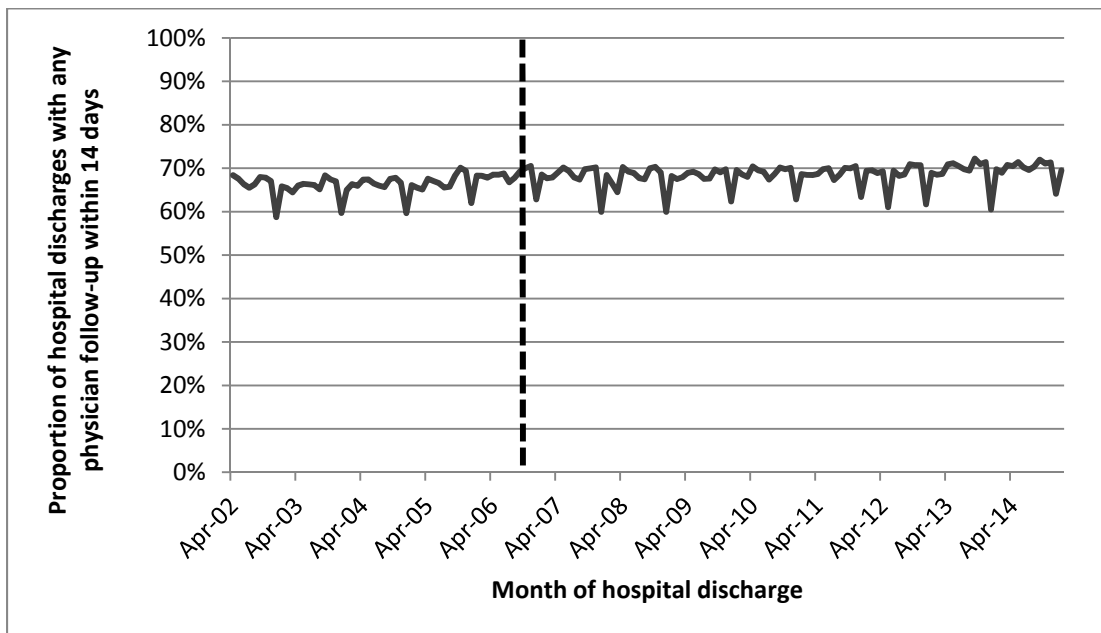

**eFigure 9.** Proportion of older adult discharges (age 65+) with a physician follow-up within 14 days, by month. Dashed line identifies timing of incentive code introduction. N=3,237,889.

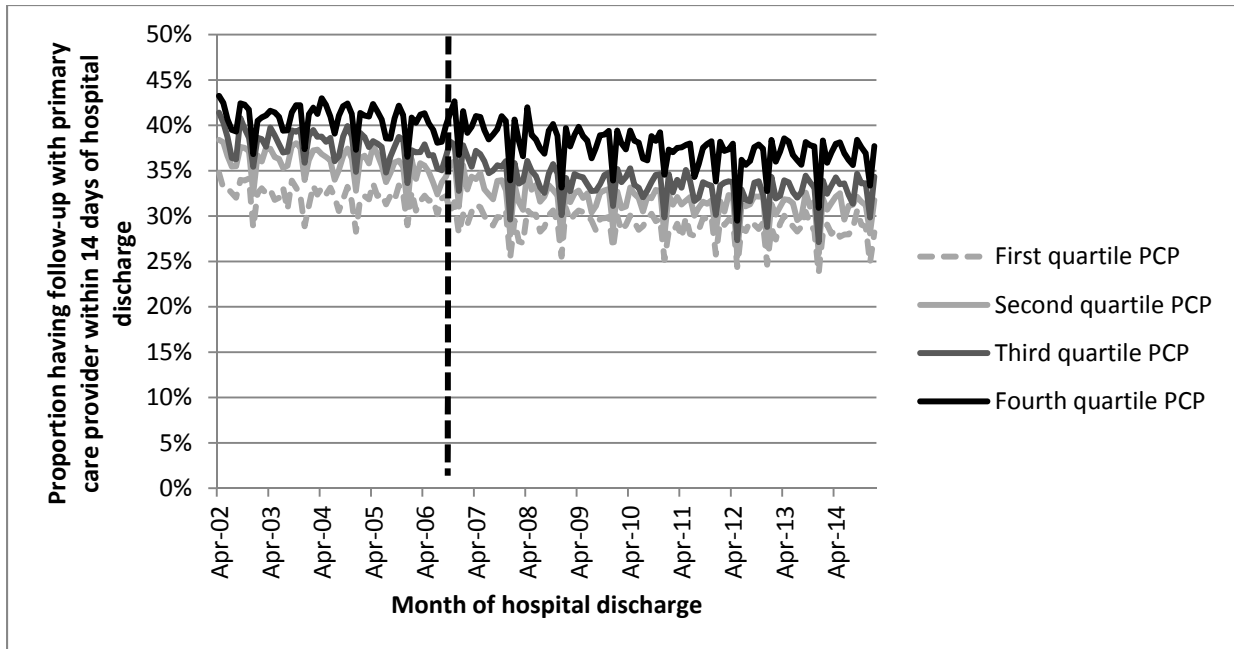

**eFigure 10.** Proportion of patient discharges having primary care physician (PCP) follow-up with 14 days of hospital discharge, by month, according to PCP quartile of incentive code uptake. Dashed line identifies timing of incentive code introduction. First quartile N=1,252,720, second quartile N=2,050,624, third quartile N=1,614,704, fourth quartile N=2,544,114.

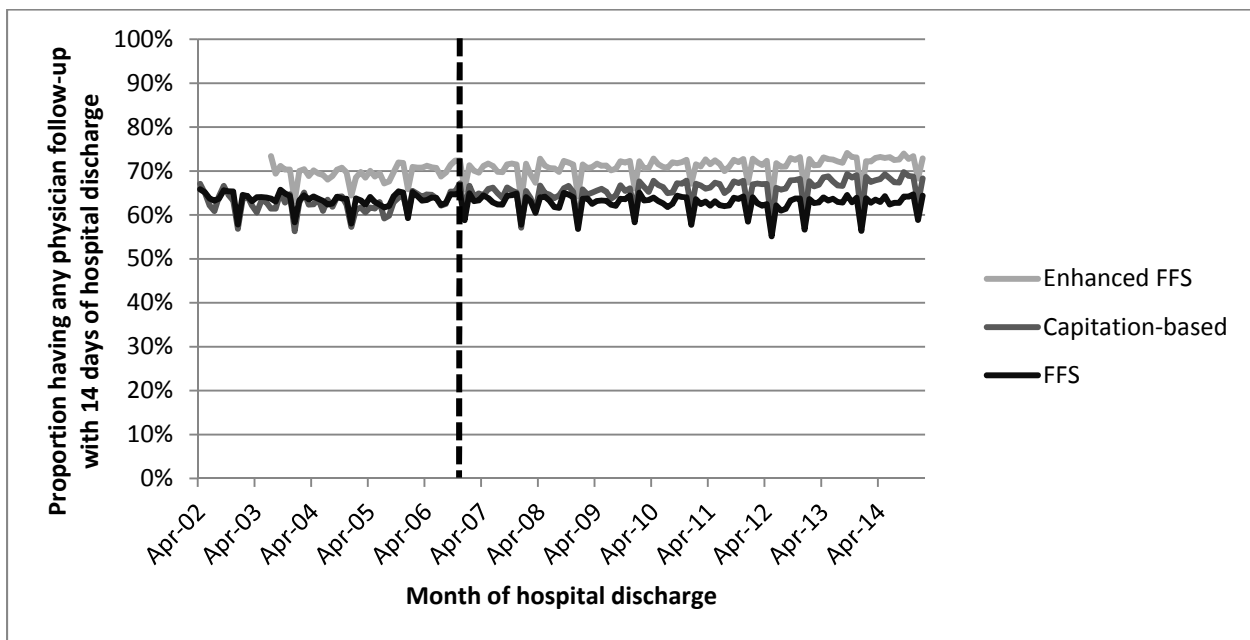

**eFigure 11.** Proportion of hospital discharges with any physician follow-up within 14 days, by month, according to primary care physician funding model. Dashed line identifies timing of incentive code introduction. FFS=fee-for-service. The intervention did not significantly affect the outcome in any funding group ( $p=0.6$  for FFS,  $p=0.3$  for capitation-based,  $p=0.8$  for enhanced FFS). N=2,206,105 for Capitation-Based, N= 3,082,191 for FFS, N=2,262,531 for Enhanced FFS.
